# Supplementary material
Source: publisher site journal article supplement (https://kjim.org/upload/media/kjim-2024-122-Supplementary-Table-3.pdf)
Supplement: Supplementary file 1 [file kjim-2024-122-Supplementary-Table-3.pdf]

**Supplementary Table 3. Cross-validation results of discriminant analysis model for metastatic LN**

| Pathologic results | Predictive results of discriminant analysis model |            | Total |
|--------------------|---------------------------------------------------|------------|-------|
|                    | Benign                                            | Metastatic |       |
| Benign LN          | 37                                                | 11         | 48    |
| Metastatic LN      | 6                                                 | 30         | 36    |

LN, lymph node.
